# Supplementary material for: Enhanced nitrate removal in an Fe0-driven autotrophic denitrification system using hydrogen-rich water
Source: Royal Society of Chemistry journal article supplement (doi:10.1039/c9ew00423h), 2019-01-01
Supplement: c9ew00423h1.pdf [file c9ew00423h1.pdf]

## Supporting Information

### Enhanced nitrate removal in an Fe<sup>0</sup>-driven autotrophic denitrification system using hydrogen-rich water

Tingting Zhu,<sup>a,1</sup> Weiwei Cai,<sup>b,1</sup> Bo Wang,<sup>a, c, d</sup> Wenzong Liu,<sup>a, \*</sup> Kai Feng,<sup>a</sup> Aijie Wang,<sup>a</sup> Ye Deng,<sup>a</sup>

<sup>a</sup> Key Laboratory of Environmental Biotechnology, Research Center for Eco-Environmental Sciences, Chinese Academy of Sciences, Beijing 100085, China

<sup>b</sup> School of Civil Engineering, Beijing Jiaotong University, Beijing 100044, China

<sup>c</sup> Sino-Danish College, University of Chinese Academy of Sciences, Beijing, 100049, China

<sup>d</sup> Sino-Danish Center for Education and Research, Beijing, 100190, China

\*Corresponding author: Key Laboratory of Environmental Biotechnology, Research Center for Eco-Environmental Sciences, Chinese Academy of Sciences, Beijing 100085, P.R. China;

E-mail: wzliu@rcees.ac.cn (Wenzong Liu)

<sup>1</sup> These authors contributed equally to this work.

## Supplemental Materials and Methods

### Reactors construction and operation.

Dual-chambered fuel cell used in this study were 54-mm-outside-diameter glass tubing and a 22-mm-outside-diameter pinch clamp assembly. The top of each chamber was sealed with a butyl rubber and thick glove box tape. Electrodes were introduced from the top by feeding a wire through a butyl stopper in the sampling port. The volume of each chamber, with the electrode, was approximately 150 ml of medium with a 50 ml headspace. The chambers were separated with a cation-selective membrane (CEM; CMI-7000, Membrane International Inc., NJ). A carbon brush (25 mm diameter, 25 mm length; 0.22 m<sup>2</sup> surface area; fiber type: PANEX 33 160 K, ZOLTEK) was soaked in acetone for 24 h, and heated in muffle furnace at 450 °C for 60 min before used as the anode electrode. Carbon cloth coated with Pt catalyst layer (10% Pt/C mixed with nafion solution to obtain 0.5 mg Pt/cm<sup>2</sup>) on the one side was assembled as cathode electrode, total surface was 7 cm<sup>2</sup>.

The activated sludge was collected from Gao Beidian water plant (Beijing, China) as the initial inoculation solution. The anode growth medium contained a phosphate buffer (50mM phosphate buffer solution, PBS; Na<sub>2</sub>HPO<sub>4</sub>·12H<sub>2</sub>O, 11.55 g/L; NaH<sub>2</sub>PO<sub>4</sub>·2H<sub>2</sub>O, 2.77 g/L; pH=7.0), nutrient solution (NH<sub>4</sub>Cl, 0.31 g/L; KCl, 0.13 g/L; trace nutrient medium) and sodium acetate (1.5 g/L) as the carbon source. The cathode medium only contained phosphate buffer (50mM PBS). All of the anode and cathode influent were continuously bubbled with a slow stream of N<sub>2</sub>-CO<sub>2</sub> (80:20). All dual-chambered fuel cell were connected to a power source and the applied voltage was 0.8 V.

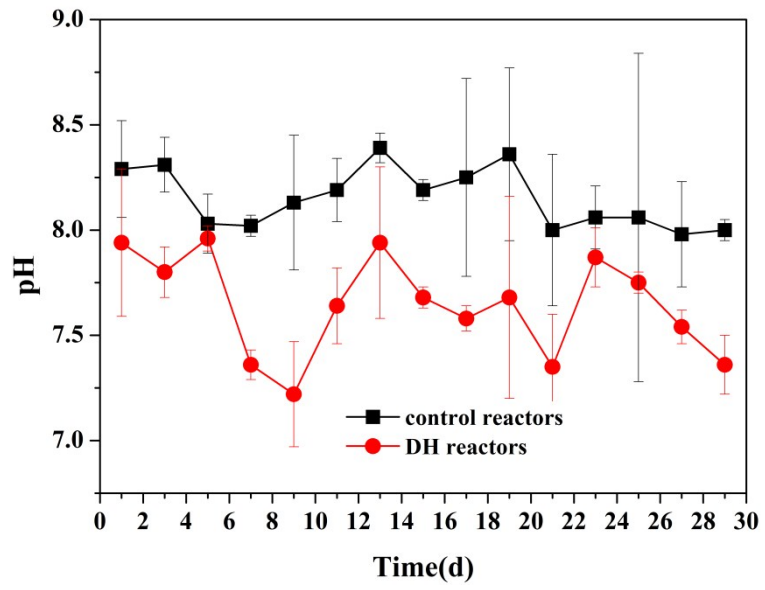

**Fig.S1 pH in the effluent of the control and DH reactors**
